# Supplementary material for: Subaqueous speleothems (Hells Bells) formed by the interplay of pelagic redoxcline biogeochemistry and specific hydraulic conditions in the El Zapote sinkhole, Yucatán Peninsula, Mexico
Source: Copernicus journal article supplement (doi:10.5194/bg-16-2285-2019), 2019-06-04
Supplement: Supplementary file [file bg-16-2285-2019-supplement.pdf]

Supplement of Biogeosciences, 16, 2285–2305, 2019  
<https://doi.org/10.5194/bg-16-2285-2019-supplement>  
© Author(s) 2019. This work is distributed under  
the Creative Commons Attribution 4.0 License.

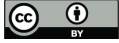

*Supplement of*

**Subaqueous speleothems (Hells Bells) formed by the interplay of pelagic redoxcline biogeochemistry and specific hydraulic conditions in the El Zapote sinkhole, Yucatán Peninsula, Mexico**

**Simon Michael Ritter et al.**

*Correspondence to:* Simon Michael Ritter ([simon.ritter@geow.uni-heidelberg.de](mailto:simon.ritter@geow.uni-heidelberg.de))

The copyright of individual parts of the supplement might differ from the CC BY 4.0 License.

1 Supplement to “Subaqueous speleothems (Hells Bells) formed by the interplay of pelagic redoxcline  
2 biogeochemistry and specific hydraulic conditions in the El Zapote sinkhole, Yucatán Peninsula, Mexico”.

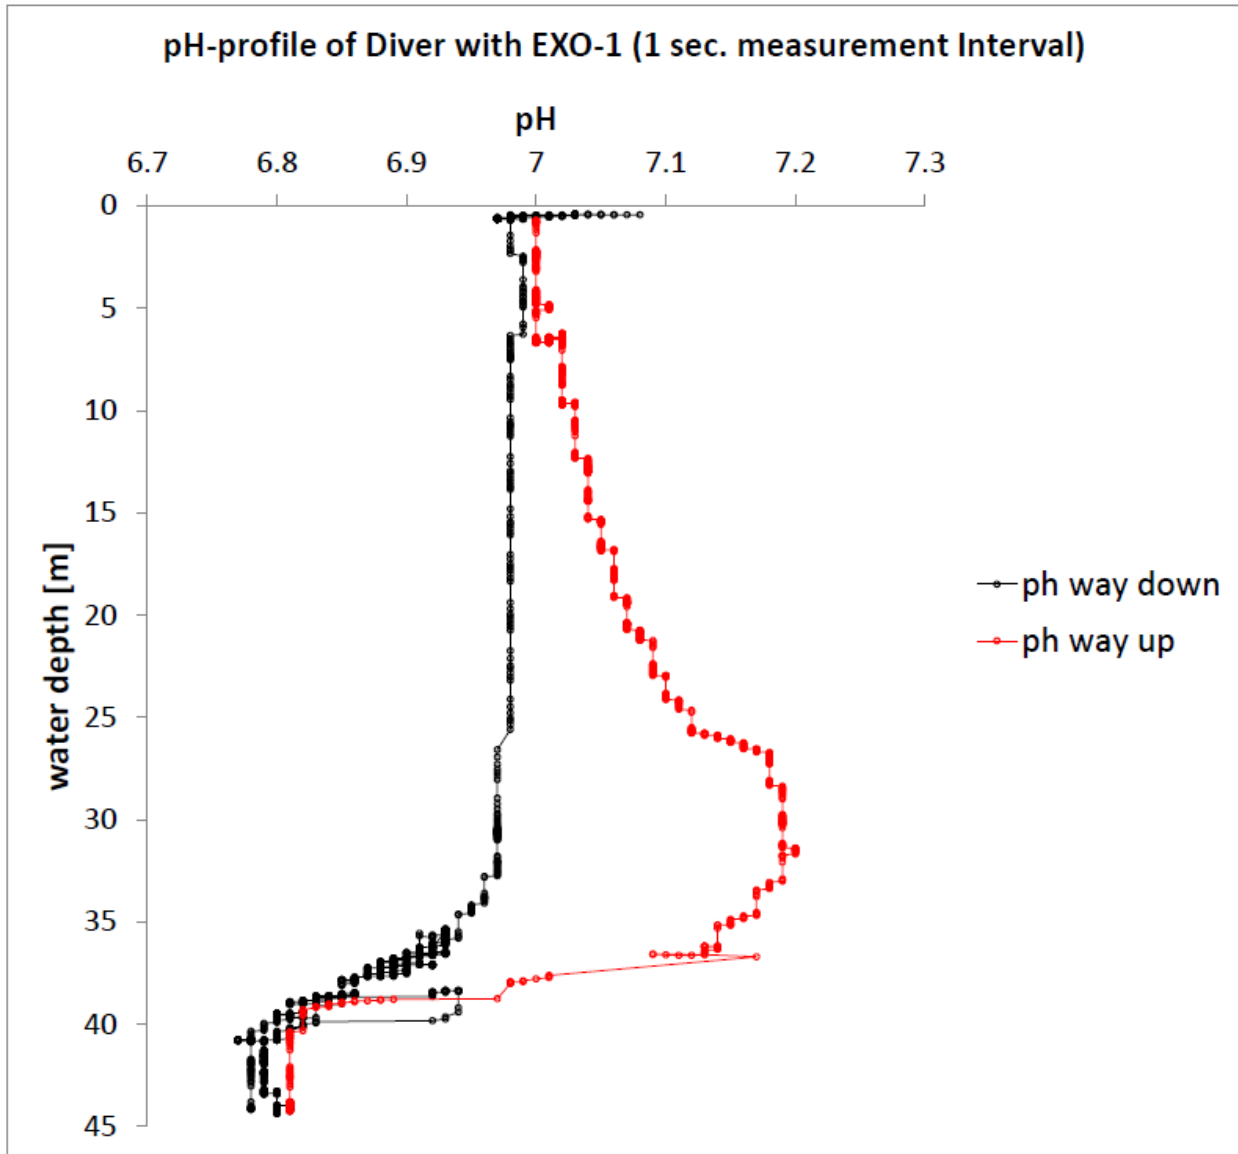

3  
4 Fig. S1: pH-logs of EXO-1 probe deployed at a dive down to 45 m water depth. The probe was attached to the gas bottle of  
5 a technical diver and pH was logged every second. The pH-electrode reacted on elevated sulfide concentrations below 36 m  
6 water depth resulting in higher pH readings. This is evident in the pH readings on the way up that are elevated compared  
7 the readings on the way down. However, the probe seems to regenerate itself in some time after the exposure to sulfide.

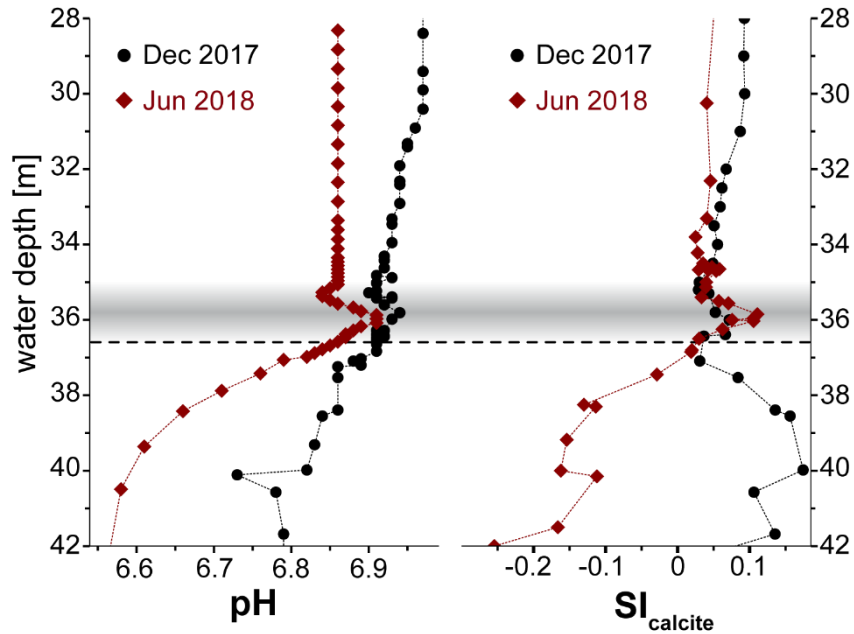

8  
 9 **Fig. S2: pH values and calculated saturation indices for calcite at different water depths of the two sampling campaigns in**  
 10 **December 2017 and June 2018. Note the distinct peak of calcite oversaturation at ~35.8 m water depth and the difference of**  
 11 **pH and SI values below the turbid layer (grey band), which is due to a non-quantifiable positive pH shift in the measurement**  
 12 **of December 2017 (see also Fig. S1).**

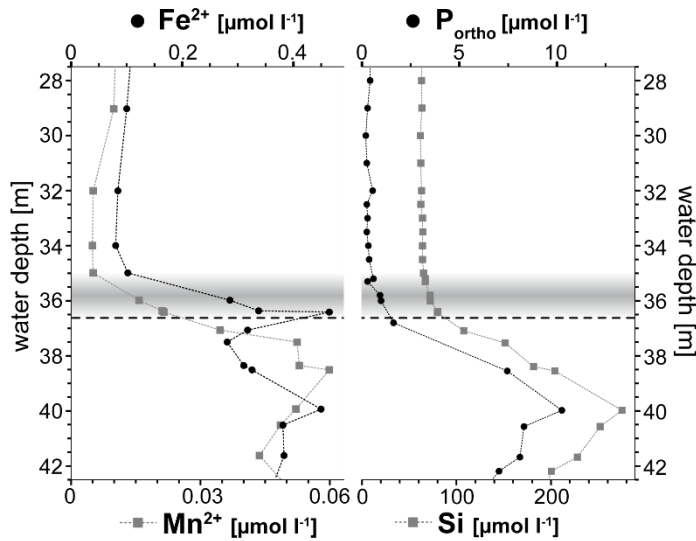

13  
 14 **Fig. S3: Concentrations of dissolved iron and manganese (left) and orthophosphate and silica (right) in 28–42 m water depth.**  
 15 **The grey band represents the turbid layer in 35–36.6 m water depth and the dashed line indicates the top of the halocline at**  
 16 **36.6 m water depth.**

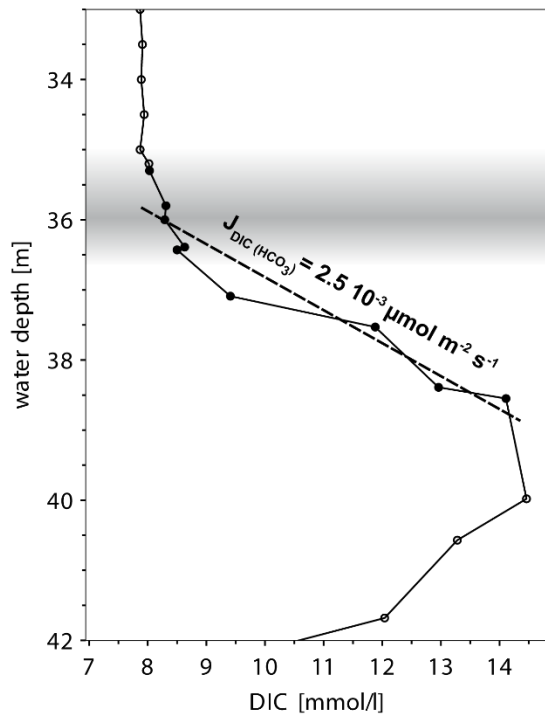

17  
 18 **Fig. S4:** Concentration of DIC with water depth at El Zapote cenote. The flux of DIC towards the redoxcline was calculated  
 19 after Fick's first law using the diffusion coefficient of  $\text{HCO}_3^-$  from the linear regression of the data points indicated by a full  
 20 circle.

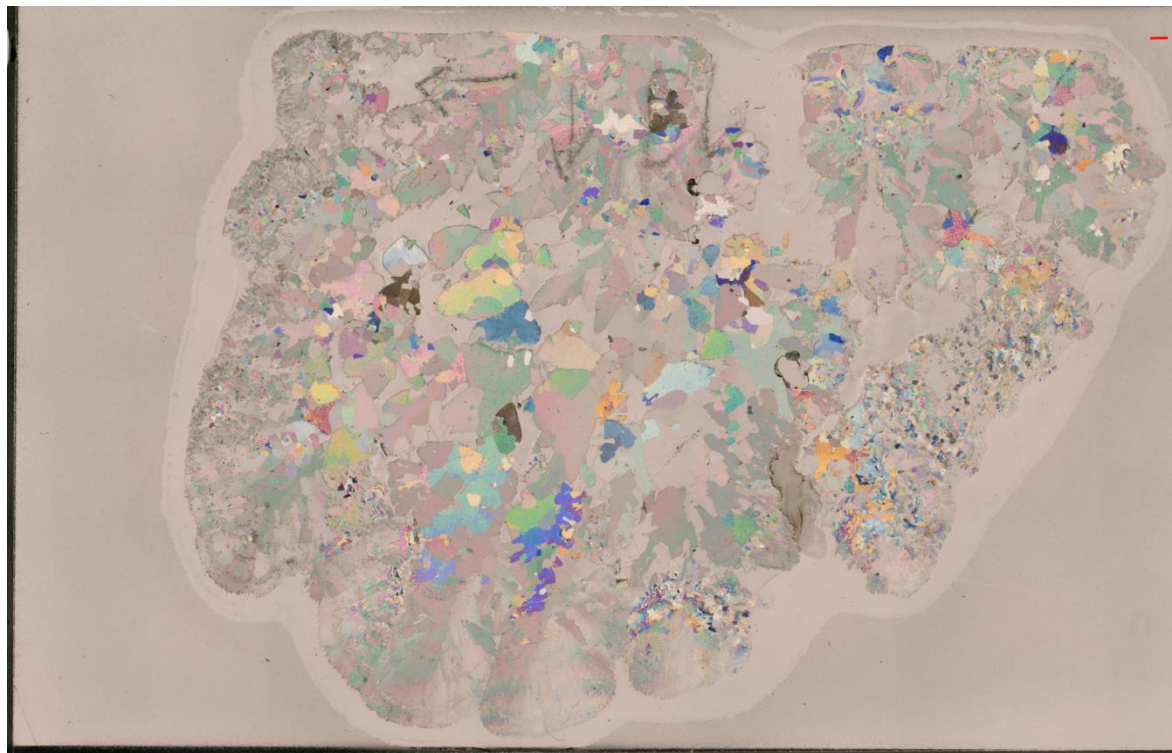

21  
 22 **Fig. S5:** Polarized-light microscopic image (crossed polarizers) of a thin section of the lowermost part of ZPT-7. The red  
 23 scale bar on the upper right are 500  $\mu\text{m}$ . Note the two different calcite phases of mosaic or blocky calcites in the upper part  
 24 and botryoidal fan-like calcite needles in the lower part of the thin section. Note the strong resemblance of the botryoidal  
 25 calcites in the lower part to the macroscopic shape of the conical Hells Bells.

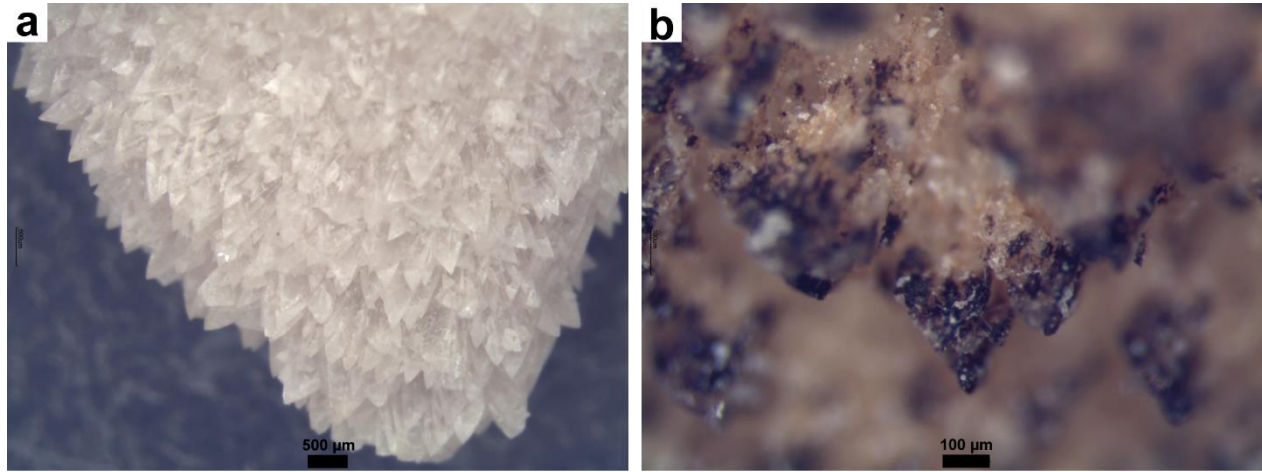

26  
27 **Fig. S6: Light microscopic images of Hells Bells calcite needles of clear white Hells Bells found below ~30 m water depth**  
28 **and with brownish Mn-oxide coatings on Hells Bells from 28–30 m water.**

29 **Table S1: In-Situ parameter readings from EXO-1 probe. Given values represent the last values of measuring >1 min at a**  
30 **certain water depth.**

**In-Situ Parameters readings (EXO-1)**

| Profile - type  | date [d.m.y] | water depth [m] | sp. Conductivity $\mu\text{S/cm}$ | O2 mg/l | Turbidity FNU | pH   | Temp $^{\circ}\text{C}$ | EH mV |
|-----------------|--------------|-----------------|-----------------------------------|---------|---------------|------|-------------------------|-------|
| winch profile 1 | 11.12.2017   | 11.69           | 1435                              | 3.85    | -0.21         | 6.97 | 24.373                  | 221.8 |
| winch profile 1 | 11.12.2017   | 21.23           | 1441.2                            | 3.8     | -0.2          | 6.97 | 24.404                  | 232.4 |
| winch profile 1 | 11.12.2017   | 26.25           | 1441.5                            | 3.76    | -0.21         | 6.97 | 24.411                  | 238   |
| winch profile 1 | 11.12.2017   | 32.32           | 1583.2                            | 2.33    | -0.19         | 6.94 | 24.553                  | 242.1 |
| winch profile 1 | 11.12.2017   | 33.32           | 1624.2                            | 1.94    | -0.18         | 6.93 | 24.573                  | 242   |
| winch profile 1 | 11.12.2017   | 34.31           | 1695.8                            | 1.11    | -0.16         | 6.92 | 24.598                  | 240.3 |
| winch profile 1 | 11.12.2017   | 35.28           | 1803.9                            | <0.2    | 1.1           | 6.9  | 24.626                  | 236.8 |
| winch profile 1 | 11.12.2017   | 36.28           | 2276.9                            | <0.2    | 1.36          | 6.91 | 24.668                  | 54.2  |
| winch profile 1 | 11.12.2017   | 37.24           | 5398                              | <0.2    | -0.06         | 6.86 | 24.718                  | -41.8 |
| winch profile 2 | 11.12.2017   | 0.47            | 1436.3                            | 4       | -0.16         | 6.97 | 24.373                  | 262.8 |
| winch profile 2 | 11.12.2017   | 28.40           | 1446.7                            | 3.69    | -0.21         | 6.97 | 24.412                  | 267.4 |
| winch profile 2 | 11.12.2017   | 29.41           | 1445.7                            | 3.74    | -0.21         | 6.97 | 24.418                  | 269.9 |
| winch profile 2 | 11.12.2017   | 29.90           | 1446                              | 3.73    | -0.21         | 6.97 | 24.416                  | 271.4 |
| winch profile 2 | 11.12.2017   | 30.41           | 1452.1                            | 3.64    | -0.17         | 6.97 | 24.436                  | 272.3 |
| winch profile 2 | 11.12.2017   | 30.91           | 1488.6                            | 3.33    | -0.23         | 6.96 | 24.485                  | 273.1 |
| winch profile 2 | 11.12.2017   | 31.32           | 1523.6                            | 2.99    | -0.21         | 6.95 | 24.498                  | 241.5 |
| winch profile 2 | 11.12.2017   | 31.41           | 1541.1                            | 2.86    | -0.22         | 6.95 | 24.535                  | 273.5 |
| winch profile 2 | 11.12.2017   | 31.91           | 1578.5                            | 2.52    | -0.15         | 6.94 | 24.55                   | 273.6 |
| winch profile 2 | 11.12.2017   | 32.41           | 1591.1                            | 2.39    | -0.23         | 6.94 | 24.558                  | 273.4 |
| winch profile 2 | 11.12.2017   | 32.91           | 1612.8                            | 2.09    | -0.24         | 6.94 | 24.57                   | 273.1 |
| winch profile 2 | 11.12.2017   | 33.46           | 1644.8                            | 1.66    | -0.18         | 6.93 | 24.583                  | 272.6 |
| winch profile 2 | 11.12.2017   | 33.95           | 1667.1                            | 1.45    | -0.2          | 6.93 | 24.59                   | 271.9 |

|                 |            |       |         |      |       |      |        |        |
|-----------------|------------|-------|---------|------|-------|------|--------|--------|
| winch profile 2 | 11.12.2017 | 34.42 | 1704.1  | 1.04 | -0.17 | 6.92 | 24.602 | 270.6  |
| winch profile 2 | 11.12.2017 | 34.62 | 1741.9  | 0.6  | -0.13 | 6.92 | 24.611 | 268.8  |
| winch profile 2 | 11.12.2017 | 34.82 | 1771    | 0.38 | 0.04  | 6.91 | 24.62  | 266.5  |
| winch profile 2 | 11.12.2017 | 35.02 | 1793.5  | 0.21 | 0.85  | 6.91 | 24.629 | 263.9  |
| winch profile 2 | 11.12.2017 | 35.23 | 1852    | <0.2 | 1.89  | 6.91 | 24.637 | 252.8  |
| winch profile 2 | 11.12.2017 | 35.42 | 1877.1  | <0.2 | 4.03  | 6.91 | 24.641 | 233.6  |
| winch profile 3 | 11.12.2017 | 34.88 | 1769.4  | 0.53 | 0.06  | 6.93 | 24.608 | 282.6  |
| winch profile 3 | 11.12.2017 | 35.38 | 1843.6  | <0.2 | 3     | 6.91 | 24.632 | 280.6  |
| winch profile 3 | 11.12.2017 | 35.60 | 1914.9  | <0.2 | 6.04  | 6.92 | 24.644 | 274.4  |
| winch profile 3 | 11.12.2017 | 35.81 | 2008.3  | <0.2 | 6.71  | 6.94 | 24.654 | 150.8  |
| winch profile 3 | 11.12.2017 | 35.98 | 2118.9  | <0.2 | 3.01  | 6.93 | 24.662 | 70.9   |
| winch profile 3 | 11.12.2017 | 36.28 | 2303.4  | <0.2 | 1.58  | 6.92 | 24.672 | 20.3   |
| winch profile 3 | 11.12.2017 | 36.47 | 2588.6  | <0.2 | 0.64  | 6.91 | 24.681 | -11.1  |
| winch profile 3 | 11.12.2017 | 36.53 | 2697.4  | <0.2 | 1.04  | 6.91 | 24.685 | -30    |
| winch profile 4 | 12.12.2017 | 35.42 | 1861.1  | <0.2 | 2.99  | 6.93 | 24.619 | 191.1  |
| winch profile 4 | 12.12.2017 | 36.44 | 2568.6  | <0.2 | 0.74  | 6.92 | 24.692 | -22.9  |
| winch profile 4 | 12.12.2017 | 36.64 | 2891.5  | <0.2 | 0.34  | 6.91 | 24.692 | -42.8  |
| winch profile 4 | 12.12.2017 | 36.83 | 3520    | <0.2 | 0.06  | 6.91 | 24.705 | -69.6  |
| winch profile 4 | 12.12.2017 | 37.03 | 4288.2  | <0.2 | 0.01  | 6.89 | 24.714 | -87    |
| winch profile 4 | 12.12.2017 | 37.20 | 5325.7  | <0.2 | -0.02 | 6.89 | 24.728 | -108.8 |
| diver profile 1 | 14.12.2017 | 35.39 | 2024.8  | 0.29 | 4.12  | 6.93 | 24.637 | 109.4  |
| diver profile 1 | 14.12.2017 | 36.39 | 2487.7  | <0.2 | 2.57  | 6.91 | 24.66  | 66     |
| diver profile 1 | 14.12.2017 | 36.43 | 2522.6  | <0.2 | 2.63  | 6.92 | 24.655 | 7.9    |
| diver profile 1 | 14.12.2017 | 37.09 | 4552.2  | <0.2 | 0.7   | 6.88 | 24.694 | -10.4  |
| diver profile 1 | 14.12.2017 | 37.53 | 9162.1  | <0.2 | 0.29  | 6.86 | 24.736 | -58.1  |
| diver profile 1 | 14.12.2017 | 38.39 | 12773.4 | <0.2 | 0     | 6.86 | 24.767 | -104.2 |
| diver profile 1 | 14.12.2017 | 38.55 | 17193.7 | <0.2 | -0.08 | 6.84 | 24.784 | -117.5 |
| diver profile 1 | 14.12.2017 | 39.98 | 24954.2 | <0.2 | -0.11 | 6.82 | 24.825 | -133.1 |
| diver profile 1 | 14.12.2017 | 40.57 | 32121.7 | <0.2 | -0.14 | 6.78 | 24.889 | -139.1 |
| diver profile 1 | 14.12.2017 | 41.68 | 36802.8 | <0.2 | -0.19 | 6.79 | 24.944 | -148   |
| diver profile 1 | 14.12.2017 | 42.19 | 38334.8 | <0.2 | -0.22 | 6.79 | 24.965 | -148.6 |
| diver profile 1 | 14.12.2017 | 44.20 | 41974.3 | <0.2 | -0.2  | 6.8  | 25.026 | -147.6 |
| diver profile 1 | 14.12.2017 | 44.05 | 42961.6 | <0.2 | -0.25 | 6.81 | 25.047 | -145.5 |
| diver profile 2 | 15.12.2017 | 40.11 | 27055.2 | <0.2 | -0.1  | 6.73 | 24.849 | -83.7  |
| diver profile 2 | 15.12.2017 | 48.98 | 48408.2 | <0.2 | -0.24 | 6.94 | 25.214 | -133.3 |
| diver profile 2 | 15.12.2017 | 43.51 | 41866.1 | <0.2 | -0.21 | 6.78 | 25.02  | -135.9 |
| diver profile 2 | 15.12.2017 | 39.31 | 19594   | <0.2 | -0.09 | 6.83 | 24.814 | -139.4 |
| diver profile 2 | 15.12.2017 | 45.62 | 44910.1 | <0.2 | -0.18 | 6.78 | 25.033 | -136.3 |
| diver profile 2 | 15.12.2017 | 47.80 | 46661.9 | <0.2 | -0.2  | 6.79 | 25.065 | -136.4 |
| diver profile 2 | 15.12.2017 | 50.53 | 48476.4 | <0.2 | -0.26 | 6.95 | 25.219 | -131.4 |

---

|                 |            |       |         |      |       |      |        |        |
|-----------------|------------|-------|---------|------|-------|------|--------|--------|
| diver profile 2 | 15.12.2017 | 49.09 | 48449.5 | <0.2 | -0.26 | 6.95 | 25.218 | -131.5 |
|-----------------|------------|-------|---------|------|-------|------|--------|--------|

## Water geochemical analyses I

| Sample ID | Type  | water depth<br>corrected*<br>[m] | measurement | ICP- | ICP-OES | ICP-OES | ICP-OES | ICP-OES | ICP-OES | IC   | IC   | IC   | TCA  | TCA   | TCA   | PM   | PM   | PM    | Ion Charge<br>Balance***<br>% |
|-----------|-------|----------------------------------|-------------|------|---------|---------|---------|---------|---------|------|------|------|------|-------|-------|------|------|-------|-------------------------------|
|           |       |                                  | method:     | OES  |         |         |         |         |         |      |      |      |      |       |       |      |      |       |                               |
| 15m       | winch | 15.00                            | 3.11        | 0.10 | 1.30    | 5.48    | 0.07    | 62.3    | 6.58    | 6.74 | 0.37 | 50.1 | 0.22 | 7.96  | 7.74  | 0.25 |      |       | -2.95                         |
| 28m       | winch | 28.00                            | 3.10        | 0.11 | 1.35    | 5.70    | 0.07    | 63.0    | 6.40    | 6.77 | 0.37 | 43.6 | 0.17 | 7.96  | 7.79  | 0.42 |      | bdl   | -2.08                         |
| 29m       | winch | 29.00                            | 3.07        | 0.11 | 1.33    | 5.49    | 0.07    | 63.4    | 6.37    | 6.74 | 0.36 | 48.8 | 0.19 | 8.04  | 7.84  | 0.29 |      | bdl   | -3.25                         |
| 30m       | winch | 30.00                            | 3.09        | 0.10 | 1.33    | 5.45    | 0.07    | 62.0    | 6.34    | 6.68 | 0.36 | 60.2 | 0.22 | 8.03  | 7.81  | 0.20 |      | bdl   | -3.03                         |
| 31m       | winch | 31.00                            | 3.13        | 0.11 | 1.36    | 5.49    | 0.07    | 62.3    | 6.37    | 6.65 | 0.37 | 50.1 | 0.20 | 8.00  | 7.81  | 0.25 |      | bdl   | -2.29                         |
| 32m       | winch | 32.00                            | 3.18        | 0.12 | 1.42    | 6.00    | 0.07    | 63.0    | 6.39    | 7.07 | 0.38 | 45.0 | 0.16 | 7.97  | 7.81  | 0.55 |      | bdl   | -1.26                         |
| 32,5m     | winch | 32.50                            | 3.13        | 0.11 | 1.38    | 5.72    | 0.07    | 62.3    | 6.37    | 7.01 | 0.38 | 42.7 | 0.22 | 7.99  | 7.77  | 0.25 |      | bdl   | -2.37                         |
| 33m       | winch | 33.00                            | 3.11        | 0.12 | 1.42    | 6.07    | 0.07    | 64.1    | 6.48    | 7.72 | 0.41 | 38.6 | 0.15 | 8.01  | 7.87  | 0.29 |      | bdl   | -3.83                         |
| 33,5m     | winch | 33.50                            | 3.14        | 0.13 | 1.49    | 6.53    | 0.07    | 64.5    | 6.58    | 8.15 | 0.43 | 33.6 | 0.15 | 8.06  | 7.91  | 0.25 |      | bdl   | -3.13                         |
| 34m       | winch | 34.00                            | 3.19        | 0.13 | 1.50    | 6.76    | 0.07    | 64.1    | 6.56    | 8.06 | 0.43 | 37.7 | 0.22 | 8.11  | 7.89  | 0.33 | bdl  | bdl   | -1.79                         |
| 34,5m     | winch | 34.50                            | 3.21        | 0.13 | 1.51    | 6.91    | 0.07    | 64.1    | 6.50    | 8.13 | 0.43 | 40.1 | 0.12 | 8.07  | 7.94  | 0.37 | bdl  | 84.00 | -1.44                         |
| 35m       | winch | 35.00                            | 3.21        | 0.14 | 1.56    | 7.30    | 0.07    | 65.2    | 6.61    | 8.72 | 0.46 | 38.2 | 0.15 | 8.02  | 7.87  |      | bdl  | 14.00 | -1.66                         |
| T_35,5    | diver | 36.00                            | 3.36        | 0.22 | 1.99    | 11.28   | 0.08    | 72.3    | 7.29    | 12.8 | 0.60 | 4.8  |      |       | 8.29  | 0.98 | 0.01 | bdl   | -0.25                         |
| T_36      | diver | 36.39                            | 3.48        | 0.31 | 2.47    | 14.83   | 0.08    | 80.1    | 8.05    | 17.6 | 0.85 | 1.5  | 0.17 | 8.80  | 8.63  |      | 0.34 | bdl   | -1.85                         |
| T_36.5    | diver | 36.43                            | 3.43        | 0.30 | 2.43    | 14.76   | 0.08    | 79.8    | 8.05    | 17.7 | 0.86 | 5.6  | 0.23 | 8.73  | 8.50  |      | 0.32 | bdl   | -2.37                         |
| T_37      | diver | 37.09                            | 3.84        | 0.61 | 4.14    | 30.22   | 0.11    | 107.7   | 11.76   | 34.2 | 1.72 | 1.5  | 0.35 | 9.76  | 9.41  |      | 0.92 | bdl   | -0.72                         |
| T_37,5    | diver | 37.53                            | 4.68        | 1.32 | 7.96    | 63.04   | 0.14    | 151.4   | 18.55   | 73.2 | 2.81 | 5.9  | 0.62 | 12.49 | 11.88 |      | 0.77 | bdl   | -0.80                         |
| T_38      | diver | 38.39                            | 5.48        | 1.80 | 11.09   | 92.17   | 0.17    | 181.6   | 25.68   | 105  | 3.74 | 10.3 | 0.61 | 13.57 | 12.96 |      | 2.80 | bdl   | -0.04                         |
| T_39      | diver | 38.55                            | 6.30        | 2.48 | 15.25   | 130.00  | 0.20    | 204.1   | 33.45   | 148  | 5.41 | 11.0 | 1.06 | 15.17 | 14.11 | 7.45 | 4.13 | bdl   | 0.15                          |
| T_40      | diver | 39.98                            | 7.86        | 3.74 | 22.63   | 188.04  | 0.28    | 275.1   | 61.64   | 228  | 9.39 | 30.3 | 0.83 | 15.28 | 14.46 | 10.2 | 5.58 | bdl   | -2.25                         |
| T_41      | diver | 40.57                            | 9.06        | 5.21 | 30.45   | 258.70  | 0.31    | 252.0   | 77.63   | 319  | 14.0 | 73.3 | 0.75 | 14.03 | 13.28 | 8.31 | 4.96 |       | -2.92                         |
| T_42      | diver | 41.68                            | 10.88       | 6.06 | 35.60   | 304.35  | 0.31    | 227.9   | 85.33   | 328  | 16.7 | 31.0 | 0.74 | 12.78 | 12.04 | 8.10 | 4.43 |       | 3.50                          |
| T_43      | diver | 42.19                            | 11.25       | 6.47 | 37.90   | 319.57  | 0.31    | 200.3   | 91.32   | 353  | 19.3 | 29.1 | 0.45 | 10.16 | 9.71  | 7.03 | 4.42 |       | 2.49                          |
| T_44      | diver | 44.20                            | 11.33       | 7.29 | 40.78   | 355.22  | 0.30    | 182.5   | 95.61   | 411  | 20.2 | 16.1 | 0.42 | 8.73  | 8.31  | 5.96 | 2.96 |       | 0.56                          |
| T_45      | diver | 44.05                            | 12.03       | 7.27 | 41.15   | 355.22  | 0.27    | 154.9   | 95.61   | 408  | 22.8 | 27.4 | 0.43 | 7.72  | 7.30  | 4.88 | 2.88 |       | 0.68                          |
| T_34,7    |       |                                  |             |      |         |         |         |         |         |      |      |      |      |       |       |      |      |       |                               |
| Niskin    | diver | 36.8**                           | 3.46        | 0.33 | 2.57    | 16.00   | 0.09    | 82.3    | 8.31    | 19.4 | 0.77 | 5.4  | 0.29 | 8.84  | 8.55  | 1.62 | 0.27 | bdl   | -2.11                         |
| P1/T      | diver | 35.8**                           | 3.32        | 0.21 | 1.90    | 10.43   | 0.08    | 71.6    | 7.31    | 12.4 | 0.59 | 16.2 | 1.73 | 10.03 | 8.31  | 0.93 | bdl  | bdl   | -1.95                         |



|      |       |        |      |      |      |      |      |      |      |      |      |      |      |      |      |      |     |       |       |
|------|-------|--------|------|------|------|------|------|------|------|------|------|------|------|------|------|------|-----|-------|-------|
| P2/T | diver | 35.2** | 3.18 | 0.15 | 1.61 | 7.71 | 0.07 | 66.6 | 6.72 | 9.39 | 0.51 | 35.2 | 0.19 | 8.21 | 8.02 | 0.59 | bdl | 84.00 | -2.80 |
| P3/T | diver | 35.3** | 3.20 | 0.16 | 1.65 | 8.10 | 0.07 | 67.3 | 6.77 | 9.81 | 0.53 | 12.0 | 0.18 | 8.21 | 8.03 | 0.29 | bdl | 749.0 | -2.54 |

\* Water depths for winch samples were not corrected. Those taken by divers were corrected from the EXO-1 readings by aligning a sample to a steady depth.

\*\* Water depths were estimated from the Na<sup>+</sup> concentration profile.

\*\*\* For the ion charge balance HCO<sub>3</sub><sup>-</sup> was regarded as the only species of DIC and a species distribution of 50% HS<sup>-</sup> and 50% H<sub>2</sub>S for the total S(-II) was assumed.

bdl = below detection limit

## Water geochemical analyses II

| Sample ID | Type  | water depth<br>corrected*<br>[m] | measurement<br>method: |        |        |        |        |        |        | CH4 |
|-----------|-------|----------------------------------|------------------------|--------|--------|--------|--------|--------|--------|-----|
|           |       |                                  | ICP-MS                 | ICP-MS | ICP-MS | ICP-MS | ICP-MS | ICP-MS | BID    |     |
|           |       |                                  | Fe                     | Mn     | P      | U      | Mo     | V      |        |     |
|           |       |                                  | μmol/l                 | μmol/l | μmol/l | nmol/l | nmol/l | nmol/l | μmol/l |     |
| 15m       | winch | 15.00                            | 0.16                   | 0.01   | 0.47   | 12.4   | 6.21   | 59.7   | 0.04   |     |
| 28m       | winch | 28.00                            |                        |        |        |        |        |        | 0.09   |     |
| 29m       | winch | 29.00                            | 0.10                   | 0.01   | 0.45   | 12.5   | 5.84   | 59.7   |        |     |
| 30m       | winch | 30.00                            |                        |        |        |        |        |        |        |     |
| 31m       | winch | 31.00                            |                        |        |        |        |        |        |        |     |
| 32m       | winch | 32.00                            | 0.09                   | 0.01   | 0.49   | 12.4   | 5.71   | 58.0   | 0.09   |     |
| 32,5m     | winch | 32.50                            |                        |        |        |        |        |        |        |     |
| 33m       | winch | 33.00                            |                        |        |        |        |        |        |        |     |
| 33,5m     | winch | 33.50                            |                        |        |        |        |        |        |        |     |
| 34m       | winch | 34.00                            | 0.08                   | 0.00   | 0.46   | 12.5   | 5.59   | 55.1   | 0.07   |     |
| 34,5m     | winch | 34.50                            |                        |        |        |        |        |        |        |     |
| 35m       | winch | 35.00                            | 0.10                   | 0.01   | 0.54   | 12.5   | 5.46   | 54.4   |        |     |
| T_35,5    | diver | 36.00                            | 0.29                   | 0.02   | 1.37   | 11.4   | 5.60   | 44.9   | 0.42   |     |
| T_36      | diver | 36.39                            | 0.34                   | 0.02   | 2.12   | 10.6   | 4.71   | 40.2   |        |     |
| T_36.5    | diver | 36.43                            | 0.47                   | 0.02   | 1.92   | 10.7   | 5.01   | 39.3   | 12.37  |     |
| T_37      | diver | 37.09                            | 0.32                   | 0.03   | 3.14   | 7.9    | 4.16   | 29.3   |        |     |
| T_37,5    | diver | 37.53                            | 0.28                   | 0.05   | 5.50   | 4.2    | 4.06   | 23.2   | 25.02  |     |
| T_38      | diver | 38.39                            | 0.31                   | 0.05   | 6.81   | 3.0    | 3.93   | 18.4   |        |     |
| T_39      | diver | 38.55                            | 0.33                   | 0.06   | 8.52   | 2.1    | 3.41   | 17.4   | 24.88  |     |
| T_40      | diver | 39.98                            | 0.45                   | 0.05   | 10.40  | 1.2    | 3.43   | 11.2   |        |     |
| T_41      | diver | 40.57                            | 0.38                   | 0.05   | 9.97   | 1.2    | 4.32   | 8.6    |        |     |
| T_42      | diver | 41.68                            | 0.39                   | 0.04   | 9.72   | 1.2    | 4.46   | 7.7    |        |     |

|        |       |        |      |      |      |     |      |      |
|--------|-------|--------|------|------|------|-----|------|------|
| T_43   | diver | 42.19  |      |      |      |     |      |      |
| T_44   | diver | 44.20  |      |      |      |     |      |      |
| T_45   | diver | 44.05  | 0.34 | 0.06 | 5.87 | 1.7 | 10.3 | 5.0  |
| T_34,7 |       |        |      |      |      |     |      |      |
| Niskin | diver | 36.8** |      |      |      |     |      | 9.51 |
| P1/T   | diver | 35.8** |      |      |      |     |      |      |
| P2/T   | diver | 35.2** |      |      |      |     |      |      |
| P3/T   | diver | 35.3** |      |      |      |     |      |      |

\* Water depths for winch samples were not corrected. Those taken by divers were corrected from the EXO-1 readings by aligning a sample to a steady depth.

\*\* Water depths were estimated from the Na concentration profile.

34

35

**Table S3: Water Isotope geochemical analyses.**

| Sample ID | Type  | water corrected*<br>[m] | depth | $\delta^{13}\text{C-CO}_2$ |              | $\delta^{13}\text{C-HCO}_3$<br>at 23°C*** |              | $\delta^{13}\text{C CH}_4$ |              |
|-----------|-------|-------------------------|-------|----------------------------|--------------|-------------------------------------------|--------------|----------------------------|--------------|
|           |       |                         |       | ‰ (VPDB)                   | 2 $\sigma$ ‰ | ‰ (VPDB)                                  | 2 $\sigma$ ‰ | ‰ (VPDB)                   | 2 $\sigma$ ‰ |
| 15m       | winch |                         | 15.00 | -18.18                     | 0.17         | -10.02                                    | 0.16         | -48.8                      | 0.3          |
| 28m       | winch |                         | 28.00 | -18.03                     | 0.13         | -9.87                                     | 0.13         | -48.5                      | 0.3          |
| 29m       | winch |                         | 29.00 |                            |              |                                           |              |                            |              |
| 30m       | winch |                         | 30.00 |                            |              |                                           |              |                            |              |
| 31m       | winch |                         | 31.00 |                            |              |                                           |              |                            |              |
| 32m       | winch |                         | 32.00 | -17.92                     | 0.27         | -9.76                                     | 0.29         | -48.3                      | 0.3          |
| 32,5m     | winch |                         | 32.50 |                            |              |                                           |              |                            |              |
| 33m       | winch |                         | 33.00 |                            |              |                                           |              |                            |              |
| 33,5m     | winch |                         | 33.50 |                            |              |                                           |              |                            |              |
| 34m       | winch |                         | 34.00 | -17.96                     | 0.26         | -9.80                                     | 0.20         | -50.7                      | 0.3          |
| 34,5m     | winch |                         | 34.50 |                            |              |                                           |              |                            |              |
| 35m       | winch |                         | 35.00 |                            |              |                                           |              |                            |              |
| T_35,5    | diver |                         | 36.00 | -16.11                     | 0.32         | -7.95                                     | 0.37         | -29.7                      | 0.3          |
| T_36      | diver |                         | 36.39 | -17.94                     | 1.04         | -9.78                                     | 0.51         | -26.1                      | 0.3          |
| T_36.5    | diver |                         | 36.43 | -17.08                     | 0.87         | -8.92                                     | 0.39         | -33.2                      | 0.3          |
| T_37      | diver |                         | 37.09 | -18.80                     | 0.28         | -10.64                                    | 0.28         |                            |              |
| T_37,5    | diver |                         | 37.53 | -19.33                     | 0.36         | -11.17                                    | 0.30         |                            |              |
| T_38      | diver |                         | 38.39 | -20.60                     | 0.29         | -12.44                                    | 0.35         |                            |              |
| T_39      | diver |                         | 38.55 | -20.43                     | 0.39         | -12.27                                    | 0.55         | -61.1                      | 0.3          |
| T_40      | diver |                         | 39.98 | -19.99                     | 0.62         | -11.83                                    | 0.55         |                            |              |
| T_41      | diver |                         | 40.57 | -20.07                     | 0.73         | -11.91                                    | 0.65         |                            |              |
| T_42      | diver |                         | 41.68 | -20.07                     | 0.71         | -11.91                                    | 0.68         |                            |              |

|               |       |        |       |        |      |        |      |       |     |
|---------------|-------|--------|-------|--------|------|--------|------|-------|-----|
| T_43          | diver |        | 42.19 |        |      |        |      |       |     |
| T_44          | diver |        | 44.20 | -19.79 | 0.71 | -11.63 | 0.69 |       |     |
| T_45          | diver |        | 44.05 |        |      |        |      |       |     |
| T_34,7 Niskin | diver | 36.8** |       | -18.59 | 0.33 | -10.43 | 0.26 | -57.9 | 0.1 |
| P1/T          | diver | 35.8** |       |        |      |        |      |       |     |
| P2/T          | diver | 35.2** |       |        |      |        |      |       |     |
| P3/T          | diver | 35.3** |       |        |      |        |      |       |     |

\* Water depths for winch samples were not corrected. Those taken by divers were corrected from the EXO-1 readings by aligning a sample to a steady depth.

\*\* Water depths were estimated from the Na concentration profile.

\*\*\* $\delta^{13}\text{C-HCO}_3$  calculated from  $\delta^{13}\text{C-CO}_2$  as equilibrium fractionation at 23°C after Mook (2001).

**Table S4: Geochemistry of Hells Bells growing on the tree that fell into the cenote. Samples were taken from different water depths.**

| Sample No. | Sample ID    | water depth [m] | Ca<br>g/kg | Mg<br>g/kg | Sr<br>mg/kg | Ba<br>mg/kg | P<br>mg/kg | S<br>mg/kg | Fe<br>mg/kg | Mn<br>mg/kg | $\delta^{13}\text{C}$<br>[‰]<br>(VPDB) | $2\sigma$ | $\delta^{18}\text{O}$ (VPDB)<br>[‰] (VPDB) | $2\sigma$ |
|------------|--------------|-----------------|------------|------------|-------------|-------------|------------|------------|-------------|-------------|----------------------------------------|-----------|--------------------------------------------|-----------|
| 1          | Z17-18J-A    | 31.3            |            |            |             |             |            |            |             |             |                                        |           |                                            |           |
| 2          | Z17-18J-B    | 31.3            | 413        | 5.38       | 377         | 18.0        | 358        | 919        | 25.0        | 5.63        | -13.47                                 | 0.01      | 3.81                                       | 0.01      |
| 3          | Z17-1617-J-A | 32.8            | 391        | 6.09       | 351         | 16.0        | 397        | 843        | 28.3        | 6.40        | -13.69                                 | 0.01      | 3.31                                       | 0.02      |
| 4          | Z17-1617-J-B | 32.8            |            |            |             |             |            |            |             |             |                                        |           |                                            |           |
| 5          | Z17-14J-A    | 33.3            | 414        | 5.54       | 387         | 18.4        | 422        | 1010       | 22.1        | 5.85        | -13.82                                 | 0.01      | 3.22                                       | 0.01      |
| 6          | Z17-14J-B    | 33.3            | 401        | 5.44       | 339         | 15.7        | 349        | 814        | 17.1        | 5.74        | -13.43                                 | 0.01      | 3.22                                       | 0.01      |
| 7          | Z17-2J-A     | 33.8            | 406        | 5.92       | 332         | 12.9        | 585        | 1030       | 35.3        | 6.27        | -12.99                                 | 0.01      | 3.00                                       | 0.01      |
| 8          | Z17-2J-B     | 33.8            | 428        | 5.40       | 356         | 16.4        | 504        | 932        | 20.8        | 5.68        | -13.52                                 | 0.01      | 3.18                                       | 0.02      |
| 9          | Z17-13J-A    | 33.9            | 400        | 5.64       | 350         | 16.2        | 433        | 884        | 22.0        | 5.93        | -13.68                                 | 0.01      | 3.30                                       | 0.01      |
| 10         | Z17-13J-B    | 33.9            |            |            |             |             |            |            |             |             |                                        |           |                                            |           |
| 11         | Z17-9J-A     | 36.8            | 337        | 4.57       | 251         | 10.1        | 511        | 848        | 53.0        | 4.80        | -12.87                                 | 0.02      | 2.74                                       | 0.01      |
| 12         | Z17-9J-B     | 36.8            | 402        | 5.16       | 300         | 12.1        | 545        | 973        | 59.4        | 5.45        | -12.85                                 | 0.00      | 2.79                                       | 0.01      |
| 13         | Z17-3J-A     | 37.3            | 406        | 5.92       | 332         | 12.9        | 585        | 1030       | 35.3        | 6.27        | -12.99                                 | 0.01      | 3.00                                       | 0.01      |
| 14         | Z17-3J-B     | 37.3            |            |            |             |             |            |            |             |             |                                        |           |                                            |           |

**Table S5: Results and parameters as well as reported values used for the estimations on calcite precipitation rates in the redoxcline of El Zapote cenote.**

| estimations on calcite precipitation and growth rates in the redoxcline of El Zapote:                                                                   |           |                                                       |                                 |                                                  |
|---------------------------------------------------------------------------------------------------------------------------------------------------------|-----------|-------------------------------------------------------|---------------------------------|--------------------------------------------------|
| $R_{\text{Nd-SO}}$ (Eq 3)                                                                                                                               | 7.3       | mmol m <sup>-2</sup> a <sup>-1</sup>                  | 2.2–6.2                         | kg a <sup>-1</sup> in the area of the redoxcline |
| $R_{\text{CO}_2\text{-assim.}}$ (Eq 4)                                                                                                                  | 40        | mmol m <sup>-2</sup> a <sup>-1</sup>                  | 12–34                           | kg a <sup>-1</sup> in the area of the redoxcline |
| $R_{\text{dark-CO}_2\text{ fixation}}$                                                                                                                  | 37–420    | mmol m <sup>-2</sup> a <sup>-1</sup>                  | 31–420                          | kg a <sup>-1</sup> in the area of the redoxcline |
| $\Sigma(R_{\text{Nd-SO}} + R_{\text{CO}_2\text{-assim.}})$                                                                                              | 47.3      | mmol m <sup>-2</sup> a <sup>-1</sup>                  | 14.2–40.2                       | kg a <sup>-1</sup> in the area of the redoxcline |
| growth rate                                                                                                                                             | 0.27–1.46 | $\mu\text{m a}^{-1}$                                  |                                 |                                                  |
| growth rate<br>(on 1 % of the area)                                                                                                                     | 27–146    | $\mu\text{m a}^{-1}$                                  |                                 |                                                  |
| reported net growth rates<br>(Stinnesbeck et al. 2017b)                                                                                                 | 12–90     | $\mu\text{m a}^{-1}$                                  |                                 |                                                  |
| Parameters used for estimations of calcite precipitation rates at El Zapote:                                                                            |           |                                                       |                                 |                                                  |
| HS <sup>-</sup> flux                                                                                                                                    | 6         | 10 <sup>-4</sup> $\mu\text{mol m}^{-2} \text{s}^{-1}$ |                                 |                                                  |
| DIC(HCO <sub>3</sub> <sup>-</sup> ) Fflux                                                                                                               | 2.5       | 10 <sup>-3</sup> $\mu\text{mol m}^{-2} \text{s}^{-1}$ |                                 |                                                  |
| diameter circular of El Zapote                                                                                                                          | 60–100    | m                                                     |                                 |                                                  |
| redoxcline thickness                                                                                                                                    | 0.5       | m                                                     |                                 |                                                  |
| calcite density                                                                                                                                         | 2.7       | g cm <sup>-3</sup>                                    |                                 |                                                  |
| reported dark CO <sub>2</sub> -fixation rates of marine and freshwater redoxclines used for the estimations of $R_{\text{dark-CO}_2\text{ fixation}}$ : |           |                                                       |                                 |                                                  |
| Jørgensen et al. (1991)                                                                                                                                 | 0.2       | $\mu\text{mol CO}_2 \text{l}^{-1} \text{d}^{-1}$      | Black Sea                       |                                                  |
| Glaubitx et al. (2009)                                                                                                                                  | 0.5       | $\mu\text{mol CO}_2 \text{l}^{-1} \text{d}^{-1}$      | Baltic Sea                      |                                                  |
| Jost et al. (2008)                                                                                                                                      | 1         | $\mu\text{mol CO}_2 \text{l}^{-1} \text{d}^{-1}$      | Baltic Sea                      |                                                  |
| Noguerola et al. (2015)                                                                                                                                 | 2.7       | $\mu\text{mol CO}_2 \text{l}^{-1} \text{d}^{-1}$      | karstic lake pelagic redoxcline |                                                  |
